# Supplementary material
Source: Springer Nature journal article supplement (https://mijn.bsl.nl/resource/supplementary/13047_2011_467_MOESM1_ESM.pdf/7111552)

**% Amputations (95% CI)**

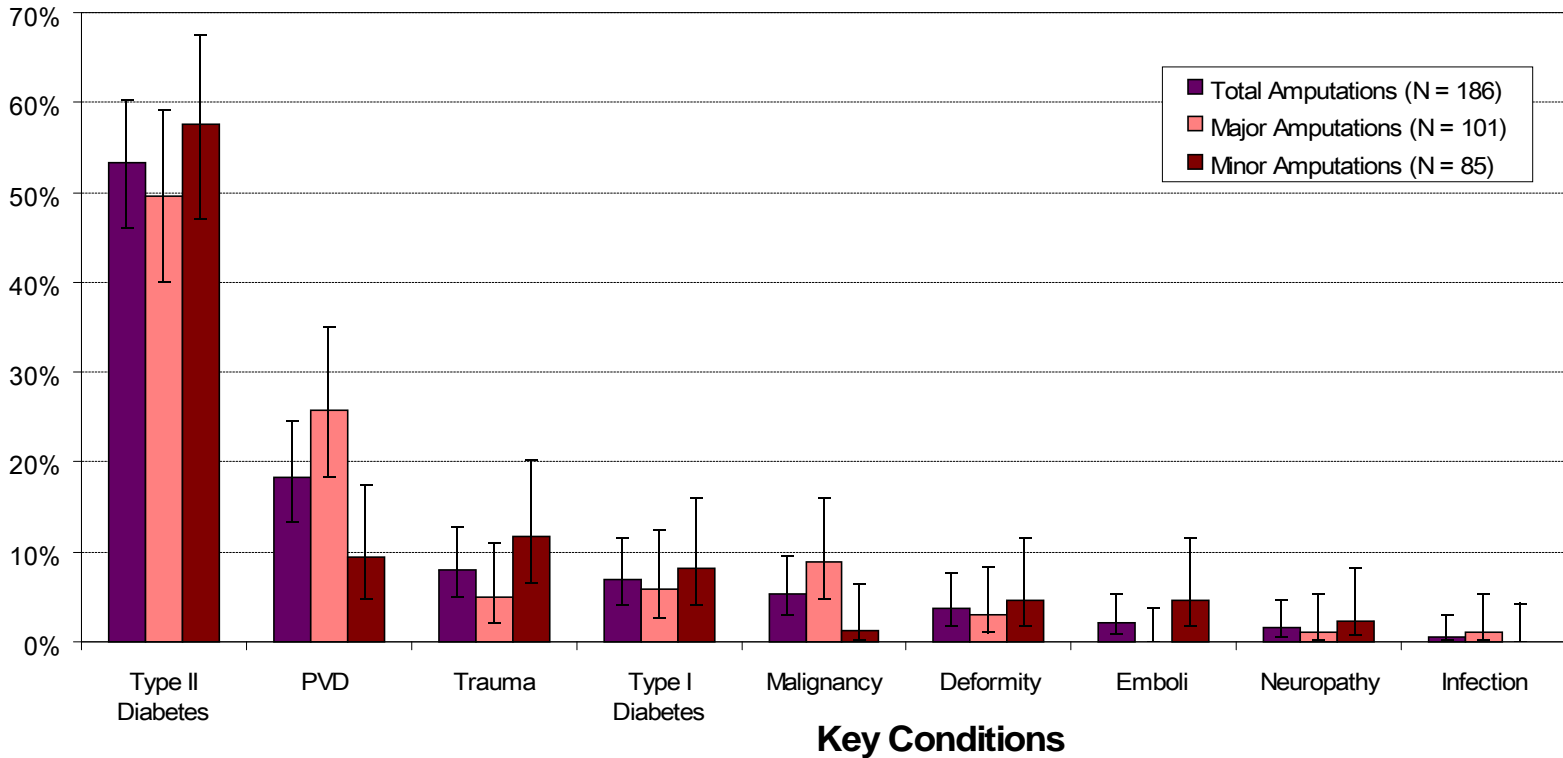

Supplement: MOESM1 [file 7111552]
